# Supplementary material for: Whole Grain Consumption and Inflammatory Markers: A Systematic Literature Review of Randomized Control Trials
Source: MDPI journal article supplement (doi:10.3390/nu14020374), 2022-01-16
Supplement: s1 [file s1]

## Supplementary Materials

Table S1. PICO framework: ‘Is there an effect of wholegrain consumption on measures of inflammation for adults?’

| PICO Categories      | Included                                                                                                                                                                                                                                                                                                      | Excluded                                             |
|----------------------|---------------------------------------------------------------------------------------------------------------------------------------------------------------------------------------------------------------------------------------------------------------------------------------------------------------|------------------------------------------------------|
| Participants         | Adults (aged $\geq 18$ years)                                                                                                                                                                                                                                                                                 | Children (aged $< 18$ years)                         |
| Interventions        | Consumption of a whole or pseudo grain<br>Cereal Grains; Wheat; including Spelt, Emmer, Einkorn, Khorasan or Kamut, Durum, and Faro; Oats, Corn/Maize, Rice, Teff, Canary Seed, Job’s Tears, Barley, Sorghum, Rye, Millet and Triticale, and Pseudo-Cereal Grains; Amaranth, Buckwheat, Quinoa and Wild Rice; | Does not meet the criteria for whole or pseudo grain |
| Control / Comparator | Refined grain, alternate food or placebo                                                                                                                                                                                                                                                                      | No comparator or control in study design             |
| Outcomes             | Change in $\geq 1$ serum inflammatory markers; interleukin-6, (IL-6), C-reactive protein, (CRP), tumour necrosis factor, (TNF).                                                                                                                                                                               | No reporting on inflammatory marker change           |

Figure S1. Inclusion and Exclusion criteria of a systematic review and meta-analysis of randomized control trials that compared whole pseudo-grain consumption in humans.

Table S2: Search terms (MEDLINE)

---

|    |                                                                                                                                                                                                                                                                            |
|----|----------------------------------------------------------------------------------------------------------------------------------------------------------------------------------------------------------------------------------------------------------------------------|
| 1  | Whole Grains/                                                                                                                                                                                                                                                              |
| 2  | whole grain.mp.                                                                                                                                                                                                                                                            |
| 3  | whole wheat.mp.                                                                                                                                                                                                                                                            |
| 4  | corn.mp.                                                                                                                                                                                                                                                                   |
| 5  | rice.mp.                                                                                                                                                                                                                                                                   |
| 6  | oat*.mp.                                                                                                                                                                                                                                                                   |
| 7  | maize*.mp.                                                                                                                                                                                                                                                                 |
| 8  | barley.mp.                                                                                                                                                                                                                                                                 |
| 9  | sorghum*.mp.                                                                                                                                                                                                                                                               |
| 10 | rye*.mp.                                                                                                                                                                                                                                                                   |
| 11 | millet.mp.                                                                                                                                                                                                                                                                 |
| 12 | triticale.mp.                                                                                                                                                                                                                                                              |
| 13 | amaranth.mp.                                                                                                                                                                                                                                                               |
| 14 | quinoa.mp.                                                                                                                                                                                                                                                                 |
| 15 | wild rice*.mp.                                                                                                                                                                                                                                                             |
| 16 | spelt.mp.                                                                                                                                                                                                                                                                  |
| 17 | emmer.mp.                                                                                                                                                                                                                                                                  |
| 18 | einkorn.mp.                                                                                                                                                                                                                                                                |
| 19 | khurasan.mp.                                                                                                                                                                                                                                                               |
| 20 | kamut.mp.                                                                                                                                                                                                                                                                  |
| 21 | durum.mp.                                                                                                                                                                                                                                                                  |
| 22 | fari.mp.                                                                                                                                                                                                                                                                   |
| 23 | teff.mp.                                                                                                                                                                                                                                                                   |
| 24 | canary seed.mp.                                                                                                                                                                                                                                                            |
| 25 | jobs tears.mp.                                                                                                                                                                                                                                                             |
| 26 | wholegrain.mp.                                                                                                                                                                                                                                                             |
| 27 | 1 or 2 or 3 or 4 or 5 or 6 or 7 or 8 or 9 or 10 or 11 or 12 or 13 or 14 or 15 or 16 or 17 or 18 or 19 or 20 or 21 or 22 or 23 or 24 or 25 or 26                                                                                                                            |
| 28 | Inflammation/                                                                                                                                                                                                                                                              |
| 29 | inflammation.mp.                                                                                                                                                                                                                                                           |
| 30 | C-Reactive Protein/                                                                                                                                                                                                                                                        |
| 31 | Tumor Necrosis Factor.mp.                                                                                                                                                                                                                                                  |
| 32 | Interleukin-6/                                                                                                                                                                                                                                                             |
| 33 | interleukin-6.mp.                                                                                                                                                                                                                                                          |
| 34 | CRP.tw.                                                                                                                                                                                                                                                                    |
| 35 | TNF.tw.                                                                                                                                                                                                                                                                    |
| 36 | IL.tw.                                                                                                                                                                                                                                                                     |
| 37 | IL-6.tw.                                                                                                                                                                                                                                                                   |
| 38 | 28 or 29 or 30 or 31 or 32 or 33 or 34 or 35 or 36 or 37                                                                                                                                                                                                                   |
| 39 | 27 and 38                                                                                                                                                                                                                                                                  |
| 40 | limit 39 to humans                                                                                                                                                                                                                                                         |
| 41 | limit 40 to ("all adult (19 plus years)" or "young adult (19 to 24 years)" or "adult (19 to 44 years)" or "young adult and adult (19-24 and 19-44)" or "middle age (45 to 64 years)" or "middle aged (45 plus years)" or "all aged (65 and over)" or "aged (80 and over)") |
| 42 | limit 41 to randomized controlled trial                                                                                                                                                                                                                                    |
| 43 | cereal.mp.                                                                                                                                                                                                                                                                 |
| 44 | cereal*.mp.                                                                                                                                                                                                                                                                |
| 45 | grain*.mp.                                                                                                                                                                                                                                                                 |
| 46 | oat*.mp.                                                                                                                                                                                                                                                                   |
| 47 | wheat.mp.                                                                                                                                                                                                                                                                  |
| 48 | bran.mp.                                                                                                                                                                                                                                                                   |
| 49 | barley.mp.                                                                                                                                                                                                                                                                 |

---

50 whole grain.mp.  
51 refined grain.mp.  
52 triticale.mp.  
53 43 or 44 or 45 or 46 or 47 or 48 or 49 or 50 or 51 or 52  
54 cytokines.mp.  
55 interleukin.mp.  
56 inflammation.mp.  
57 inflammation mediators.mp.  
58 IL.mp.  
59 C-Reactive protein.mp.  
60 CRP.mp.  
61 inflammatory.mp.  
62 tumor necrosis factor.mp.  
63 TNF.mp.  
64 interleukins.mp.  
65 54 or 55 or 56 or 57 or 58 or 59 or 60 or 61 or 62 or 63 or 64  
66 53 and 65  
67 limit 66 to humans  
68 limit 67 to ("all adult (19 plus years)" or "young adult (19 to 24 years)" or "adult (19 to 44 years)" or "young adult and adult (19-24 and 19-44)" or "middle age (45 to 64 years)" or "middle aged (45 plus years)" or "all aged (65 and over)" or "aged (80 and over)")  
69 limit 68 to randomized controlled trial  
70 limit 69 to english language

Figure S1: Cochrane Rob2 for Crossover Studies raw data

| <u>Study</u>                  | <u>D1</u> | <u>D5</u> | <u>D2</u> | <u>D3</u> | <u>D4</u> | <u>D5</u> | <u>Overall</u> |
|-------------------------------|-----------|-----------|-----------|-----------|-----------|-----------|----------------|
| Ampatzoglou et al. 2016 [24]  | !         | +         | +         | +         | +         | +         | !              |
| Andersson et al. 2007 [25]    | +         | +         | +         | +         | !         | +         | !              |
| Connolly et al. 2011 [26]     | +         | +         | +         | +         | +         | !         | !              |
| Kazemzadeh et al. 2014 [33]   | +         | +         | +         | +         | +         | +         | +              |
| Kirwan et al. 2016 [34]       | +         | +         | +         | +         | +         | +         | +              |
| Li et al. 2018 [37]           | +         | +         | +         | +         | +         | +         | +              |
| Malik et al. 2019 [38]        | +         | +         | +         | +         | +         | +         | +              |
| Meng et al. 2018 [39]         | +         | +         | +         | +         | +         | +         | +              |
| Munch Roager et al. 2019 [40] | +         | +         | +         | +         | +         | +         | +              |
| Navarro et al. 2019 [41]      | +         | +         | +         | !         | +         | +         | !              |
| Pavadhgul et al. 2019 [42]    | +         | +         | !         | +         | +         | +         | !              |
| Pourshahidi et al. 2020 [44]  | +         | +         | +         | +         | +         | +         | +              |
| Whittaker et al. 2015 [50]    | +         | +         | +         | +         | +         | +         | +              |
| Whittaker et al. 2017 [51]    | +         | +         | +         | +         | +         | +         | +              |
| Zamaratskaia et al. 2020 [52] | +         | +         | +         | +         | +         | +         | +              |

Legend:

|    |                                                |
|----|------------------------------------------------|
| +  | Low risk                                       |
| !  | Some concerns                                  |
| -  | High risk                                      |
| DS | Bias arising from period and carryover effects |
| D1 | Randomisation process                          |
| D2 | Deviations from the intended interventions     |
| D3 | Missing outcome data                           |
| D4 | Measurement of the outcome                     |
| D5 | Selection of the reported result               |

Figure S2: Cochrane Rob2 for Parallel Studies raw data

| <u>Study</u>                    | <u>D1</u> | <u>D2</u> | <u>D3</u> | <u>D4</u> | <u>D5</u> | <u>Overall</u> |
|---------------------------------|-----------|-----------|-----------|-----------|-----------|----------------|
| Brownlee et al. 2010 [22]       | +         | -         | +         | +         | +         | !              |
| Giacco et al. 2013 [27]         | +         | +         | +         | +         | +         | +              |
| Harris Jackson et al. 2014 [28] | !         | +         | !         | +         | +         | !              |
| Hoevenaars et al. 2019 [29]     | +         | +         | +         | +         | +         | +              |
| Iversen et al. 2021 [30]        | !         | +         | +         | +         | +         | !              |
| Joo et al. 2020 [31]            | !         | !         | +         | +         | !         | !              |
| Katcher et al. 2008 [32]        | +         | +         | +         | +         | +         | +              |
| Kondo et al. 2017 [35]          | +         | +         | +         | +         | +         | +              |
| Kopf et al. 2018 [36]           | +         | +         | +         | +         | +         | +              |
| Ma et al. 2013 [23]             | +         | +         | +         | +         | +         | +              |
| Pavithran et al. 2020 [43]      | !         | +         | +         | +         | +         | !              |
| Saglam et al. 2018 [45]         | +         | +         | !         | +         | +         | !              |
| Schutte et al. 2018 [46]        | +         | +         | +         | +         | +         | +              |
| Tighe et al. 2010 [47]          | +         | +         | +         | !         | +         | !              |
| Vetrani et al. 2016 [48]        | +         | +         | +         | +         | +         | +              |
| Vitaglione et al. 2015 [49]     | +         | +         | +         | +         | +         | +              |

Legend:

|    |                                            |
|----|--------------------------------------------|
| +  | Low risk                                   |
| !  | Some concerns                              |
| -  | High risk                                  |
| D1 | Randomisation process                      |
| D2 | Deviations from the intended interventions |
| D3 | Missing outcome data                       |
| D4 | Measurement of the outcome                 |
| D5 | Selection of the reported result           |
